# Supplementary material for: Comparison of zebrafish and mice knockouts for Megalencephalic Leukoencephalopathy proteins indicates that GlialCAM/MLC1 forms a functional unit
Source: Springer Nature journal article supplement (doi:10.1186/s13023-019-1248-5), 2019-11-21
Supplement: MOESM1 [file 17415960]

IP with glialcama antibody

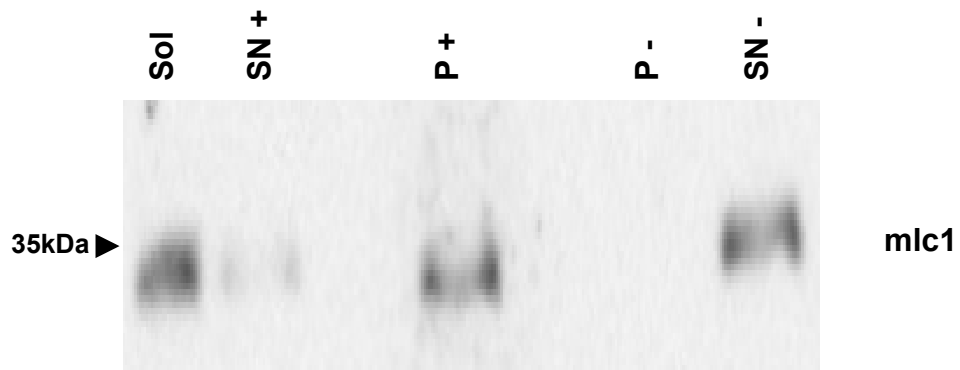

Figure S1
