# Supplementary material for: Comparison of zebrafish and mice knockouts for Megalencephalic Leukoencephalopathy proteins indicates that GlialCAM/MLC1 forms a functional unit
Source: Springer Nature journal article supplement (doi:10.1186/s13023-019-1248-5), 2019-11-21
Supplement: MOESM2 [file 17415960]

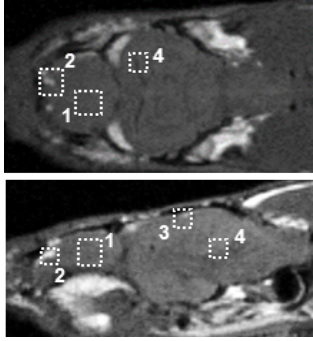

|   | Brain area                 | WT        | <i>mlc1 ko</i> | <i>mlc1 ko, glialcama ko</i> |
|---|----------------------------|-----------|----------------|------------------------------|
| 1 | Ventral telencephalon      | 23.4±1.02 | 24.8±1.25      | 22.7±1.08                    |
| 2 | Lesions (in telencephalon) | -         | 30.9±1.68      | 29.2±1.12                    |
| 3 | Lesions (in mesencephalon) | -         | 26.6±1.57      | 29.4±1.57                    |
| 4 | Ventricle                  | 34.6±3.16 | 36.1±2.74      | 33.1±1.90                    |

**Figure S2**
